# Supplementary material for: Patient General Condition at Diagnosis: A Systematic Evaluation for Adults Diagnosed with Hematologic Malignancies
Source: PubMed Central journal article supplement (PMC7564839; doi:10.3390/jpm10030106), 2020-08-27
Supplement: jpm-10-00106-s001.pdf [file jpm-10-00106-s001.pdf]

## **APPENDIX**

### **PATIENT GENERAL CONDITION AT DIAGNOSIS: A SYSTEMATIC EVALUATION FOR ADULTS DIAGNOSED WITH HEMATOLOGICAL MALIGNANCIES**

#### **Patient characteristics**

The characteristics of the 27 patients excluded from the study were as follows:

- Gender: 15 male, 5 female
- Age distribution: range 50-91, median 75, 50-64 (6), 65-74 (4), 75 and over (12)
- Performance status (ECOG): PS-0 (5), PS-1 (6), PS-2 (4), PS-3 (5), PS-4 (0), not available (2)
- Diagnosis: acute leukemia (1), myeloproliferative neoplasms (0), myelodysplastic syndromes (3), chronic lymphocytic leukemia and related disorders (2), Hodgkin's lymphoma (1), other lymphomas 5, multiple myeloma(5), multicentric Castleman's disease (1), not available (2).

## Research team characteristics

| INVESTIGATOR                      | EXPERIENCE IN HEMATOLOGY                                      | EXPERIENCE IN GERIATRICS       | FAMILIARITY WITH ASSESSMENTS                                              |
|-----------------------------------|---------------------------------------------------------------|--------------------------------|---------------------------------------------------------------------------|
| <b>Fernando Ramos</b>             | Licensed Hematologist<br>Staff<br>Head of Clinical Hematology | Low                            | ECOG: High<br>LEE: High<br>GAH: Intermediate<br>CGA: Low                  |
| <b>Paola González-Carmona</b>     | Resident (Hematology)                                         | None                           | ECOG: High<br>LEE: Intermediate<br>GAH: Low<br>CGA: None                  |
| <b>María Isabel Porrás-Guerra</b> | Low                                                           | Licensed Geriatrician<br>Staff | ECOG: Intermediate<br>LEE: Intermediate<br>GAH: Intermediate<br>CGA: High |
| <b>Sonia Jiménez-Mola</b>         | Low                                                           | Licensed Geriatrician<br>Staff | ECOG: Intermediate<br>LEE: Intermediate<br>GAH: Intermediate<br>CGA: High |
| <b>Ana María Martínez-Peláez</b>  | Licensed Nurse<br>(Hematology, Day Hospital)<br>Staff         | Low                            | ECOG: Intermediate<br>LEE: Intermediate<br>GAH: Intermediate<br>CGA: None |
| <b>Agustín Blanco-Cabiellas</b>   | Licensed Nurse<br>(Hematology Ward)<br>Staff                  | Low                            | ECOG: Intermediate<br>LEE: Intermediate<br>GAH: Intermediate<br>CGA: None |
| <b>Saray Conde</b>                | Licensed Nurse<br>(Hematology, Day Hospital)<br>Staff         | Low                            | ECOG: Intermediate<br>LEE: Intermediate<br>GAH: Intermediate<br>CGA: None |
| <b>Abdolah Ahmadi</b>             | Licensed Hematologist                                         | None                           | ECOG: High<br>LEE: High<br>GAH: None<br>CGA: None                         |
| <b>Marta Castellanos</b>          | Licensed Hematologist                                         | None                           | ECOG: High<br>LEE: High<br>GAH: None<br>CGA: None                         |
| <b>Seila Cerdá</b>                | Licensed Hematologist                                         | None                           | ECOG: High<br>LEE: High<br>GAH: None<br>CGA: None                         |
| <b>Natalia de las Heras</b>       | Licensed Hematologist<br>Staff                                | Low                            | ECOG: High<br>LEE: High<br>GAH: Low<br>CGA: None                          |
| <b>Elisa Menéndez</b>             | Licensed Nurse<br>(Hematology Ward)<br>Staff                  | None                           | ECOG: Intermediate<br>LEE: Intermediate<br>GAH: Intermediate<br>CGA: None |

| INVESTIGATOR                         | EXPERIENCE IN HEMATOLOGY                          | EXPERIENCE IN GERIATRICS                          | FAMILIARITY WITH ASSESSMENTS                                              |
|--------------------------------------|---------------------------------------------------|---------------------------------------------------|---------------------------------------------------------------------------|
| <b>Fernando Escalante</b>            | Licensed Hematologist Staff                       | Low                                               | ECOG: High<br>LEE: High<br>GAH: Low<br>CGA: None                          |
| <b>Silvia Fernández-Ferrero</b>      | Licensed Hematologist Staff                       | Low                                               | ECOG: High<br>LEE: High<br>GAH: Low<br>CGA: None                          |
| <b>Tamara Lado</b>                   | Licensed Hematologist                             | None                                              | ECOG: High<br>LEE: High<br>GAH: None<br>CGA: None                         |
| <b>Violeta Martínez- Robles</b>      | Licensed Hematologist                             | None                                              | ECOG: High<br>LEE: High<br>GAH: None<br>CGA: None                         |
| <b>Filomeno Rondón</b>               | Licensed Hematologist                             | None                                              | ECOG: High<br>LEE: High<br>GAH: None<br>CGA: None                         |
| <b>Irene Padilla</b>                 | Resident (Hematology)                             | None                                              | ECOG: High<br>LEE: High<br>GAH: None<br>CGA: None                         |
| <b>María Jesús Vidal</b>             | Licensed Hematologist Staff                       | Low                                               | ECOG: High<br>LEE: High<br>GAH: Low<br>CGA: None                          |
| <b>María Lavinia Villalobos</b>      | Licensed Hematologist                             | None                                              | ECOG: High<br>LEE: High<br>GAH: Low<br>CGA: None                          |
| <b>Saad Yacoubi</b>                  | Resident (Hematology)                             | None                                              | ECOG: High<br>LEE: High<br>GAH: None<br>CGA: None                         |
| <b>Francisco Javier Idoate-Gil</b>   | Low                                               | Licensed Geriatrician Staff<br>Head of Department | ECOG: Intermediate<br>LEE: Intermediate<br>GAH: Intermediate<br>CGA: High |
| <b>José Antonio Rodríguez-García</b> | Licensed Hematologist Staff<br>Head of Department | Low                                               | ECOG: High<br>LEE: High<br>GAH: None<br>CGA: None                         |

**Supplemental Table 1.** Research team members professional expertise and familiarity with tested assessments.

## Results

| <b>ECOG score</b> | <b>n</b>   | <b>%</b> |
|-------------------|------------|----------|
| <b>0</b>          | 57         | 31.3     |
| <b>1</b>          | 79         | 43.4     |
| <b>2</b>          | 26         | 14.3     |
| <b>3</b>          | 15         | 8.2      |
| <b>4</b>          | 5          | 2.7      |
| <b>TOTAL:</b>     | <b>182</b> |          |

**Supplemental Table 2.** Patient distribution according to ECOG Performance Status categories.

| <b>LEE score</b> | <b>n</b>                                    | <b>%</b> |
|------------------|---------------------------------------------|----------|
| 0-5              | 77                                          | 47.5     |
| 6-9              | 49                                          | 30.2     |
| 10-13            | 30                                          | 26.5     |
| 14+              | 6                                           | 8.2      |
| TOTAL            | 162                                         |          |
|                  | Range: 0-21, p25= 4, p50= 6, p75= 9, p90=11 |          |

**Supplemental Table 3.** Patient distribution according to Lee Index (LEE) categories.

| <b>GAH score</b>                                | <b>n</b> | <b>%</b> |
|-------------------------------------------------|----------|----------|
| 0-42                                            | 54       | 49.5     |
| 43+                                             | 55       | 50.5     |
| TOTAL                                           | 109      |          |
| Range: 0-89, p25= 10·5, p50=43, p75= 67, p90=76 |          |          |

**Supplemental Table 4.** Patient distribution according to Geriatric Assessment in Hematology (GAH) categories.

| <b>CGA categories</b> | <b>n</b> | <b>%</b> |
|-----------------------|----------|----------|
| Robust                | 33       | 57.9     |
| Vulnerable            | 19       | 33.3     |
| Fragile               | 5        | 8.8      |
| TOTAL                 | 57       |          |

**Supplemental Table 5.** Patient distribution according to Comprehensive Geriatric Assessment (CGA) categories.

| <b>Reasons</b>                 | <b>n</b> | <b>%</b> |
|--------------------------------|----------|----------|
| Patient not sent to Geriatrics | 16       | 59.3     |
| Patient non show at Geriatrics | 5        | 18.5     |
| Early death                    | 6        | 22.2     |
| TOTAL                          | 27       |          |

**Supplemental Table 6.** Reasons why patients over 75 did not underwent CGA.

| <b>Diagnosis</b>          | <b>ECOG<br/>Cutoff 3+</b>                     | <b>LEE<br/>Cutoff 6+</b> | <b>GAH<br/>Cutoff 43+</b> | <b>CGA<br/>Not robust</b> |
|---------------------------|-----------------------------------------------|--------------------------|---------------------------|---------------------------|
|                           | Patient proportion for each diagnostic subset |                          |                           |                           |
|                           |                                               |                          |                           |                           |
| Global                    | 11.0                                          | 52.5                     | 50.5                      | 42.1                      |
|                           |                                               |                          |                           |                           |
| MPN                       | 0.0                                           | 57.1                     | 12.5                      | 33.3                      |
| MDS                       | 14.8                                          | 69.2                     | 38.1                      | 23.1                      |
| Acute leukemia            | 18.2                                          | 50.0                     | 63.6                      | 25.0                      |
| Hodgkin's lymphoma        | 10.0                                          | 42.3                     | 0.0                       | 72.2                      |
| Other lymphomas           | 16.7                                          | 100.0                    | 55.6                      | 100.0                     |
| CLL and related disorders | 0.0                                           | 45.0                     | 37.5                      | 15.4                      |
| Multiple myeloma          | 18.5                                          | 57.7                     | 76.5                      | 50.0                      |
|                           |                                               |                          |                           |                           |
| p-value                   | 0.13                                          | 0.27                     | <0.03                     | <0.01                     |

**Supplemental Table 7.** Proportion of unfavorable features for the different scales according to diagnostic subsets.

ECOG, Performance status according to ECOG scale. LEE, Lee's Index for Older Adults. GAH, Geriatric Assessment in Hematology. CGA, Comprehensive geriatric assessment. MPN, Myeloproliferative neoplasms. MDS, Myelodysplastic syndromes (including MDS/MPN). CLL, Chronic lymphocytic leukemia.
